# Supplementary material
Source: Royal Society of Chemistry journal article supplement (doi:10.1039/d6cp01393g)
Supplement: d6cp01393g1.pdf [file d6cp01393g1.pdf]

Supplementary information for

**Observation of HOCO generation in  $[\text{CO}-(\text{H}_2\text{O})_n]^+$  ( $n = 2$  and  $3$ ) clusters  
by infrared photodissociation spectroscopy**

Ryonosuke Okimoto, Tatsuki Hosoda, Mizuhiro Kominato, and Asuka Fujii\*

*Department of Chemistry, Graduate School of Science, Tohoku University, Sendai 980-8578, Japan*

\* To whom correspondence addressed      Email: [asuka.fujii.c5@tohoku.ac.jp](mailto:asuka.fujii.c5@tohoku.ac.jp)

**Contents**

- 1. Optimized structures of  $[\text{CO}-(\text{H}_2\text{O})_n]^+$  ( $n = 2$  and  $3$ ) calculated at the MP2/aug-cc-pVTZ level**
- 2. Tables of calculated frequencies and intensities of each optimized structure of  $[\text{CO}-(\text{H}_2\text{O})_n]^+$  ( $n = 2$  and  $3$ ) across the full frequency range**

1. Optimized structures of  $[\text{CO}-(\text{H}_2\text{O})_n]^+$  ( $n = 2$  and 3) calculated at the MP2/aug-cc-pVTZ level

A.  $n = 2$

**W2-HOCO**

|   |             |             |             |
|---|-------------|-------------|-------------|
| O | -0.68978400 | -1.12696400 | 0.35586600  |
| H | -0.36031700 | -2.00871500 | 0.10830700  |
| H | -2.26466600 | 3.02803000  | 0.41996000  |
| C | -0.08323500 | -0.20374500 | -0.32567900 |
| O | -0.24699400 | 0.98867100  | -0.26933400 |
| O | -1.68255200 | 2.51755400  | 1.00922300  |
| H | -1.15147500 | 3.13104800  | 1.54613200  |
| H | -1.07327300 | 1.82593000  | 0.47027300  |

**W2-HCOOH**

|   |             |             |             |
|---|-------------|-------------|-------------|
| O | -0.68978400 | -1.12696400 | 0.35586600  |
| H | -0.36031700 | -2.00871500 | 0.10830700  |
| H | -2.26466600 | 3.02803000  | 0.41996000  |
| C | -0.08323500 | -0.20374500 | -0.32567900 |
| O | -0.24699400 | 0.98867100  | -0.26933400 |
| O | -1.68255200 | 2.51755400  | 1.00922300  |
| H | -1.15147500 | 3.13104800  | 1.54613200  |
| H | -1.07327300 | 1.82593000  | 0.47027300  |

**W2-PT-1**

|   |             |             |             |
|---|-------------|-------------|-------------|
| H | 1.38720000  | -1.34643600 | -0.08659500 |
| O | 1.61519200  | -0.40620200 | -0.00462200 |
| H | 0.80477800  | 0.17971700  | -0.16736500 |
| C | -0.57131300 | 1.24174200  | -0.55348500 |
| O | -1.43570400 | 1.92103300  | -0.81905000 |
| O | 2.73992700  | 0.30695300  | 2.17892400  |
| H | 3.58666100  | -0.02379400 | 2.53358700  |
| H | 2.08800100  | -0.19979300 | 0.88071600  |

**W2-PT-2**

|   |             |             |             |
|---|-------------|-------------|-------------|
| H | 2.63825300  | 1.00243200  | -0.01849800 |
| O | 1.90798400  | -0.04473800 | -0.25523900 |
| H | 0.91242600  | 0.02430400  | -0.14078200 |
| C | -0.96067100 | -0.02404900 | 0.05319600  |

|   |             |             |             |
|---|-------------|-------------|-------------|
| O | -2.08452900 | -0.10517900 | 0.16335900  |
| O | 3.34510300  | 1.84469200  | 0.24556200  |
| H | 4.27455000  | 1.56919400  | 0.30555800  |
| H | 3.28568200  | 2.62817200  | -0.32411400 |

**B.  $n = 3$**

**W3-HOCO**

|   |             |             |             |
|---|-------------|-------------|-------------|
| O | -0.72807200 | -0.04549900 | -2.08031100 |
| H | 0.13298800  | -0.32704100 | -2.43058000 |
| H | -1.91145400 | 0.78532300  | 2.88445000  |
| C | -0.61078200 | 0.29766700  | -0.82898700 |
| O | -1.49295900 | 0.68969900  | -0.11081300 |
| O | -1.54952900 | 1.47633000  | 2.31066000  |
| H | -2.08085500 | 2.37322500  | 2.39958800  |
| H | -1.49212100 | 1.14604600  | 1.35173200  |
| O | -2.69949800 | 3.66090100  | 2.46769400  |
| H | -2.32392400 | 4.37777900  | 2.99277000  |
| H | -3.64921000 | 3.81749500  | 2.40832900  |

**W3-HCOOH**

|   |             |             |             |
|---|-------------|-------------|-------------|
| O | 0.43708400  | -0.85654900 | -0.50249100 |
| H | 0.24833400  | 0.85025500  | 0.48294800  |
| C | -0.33543300 | 0.02197100  | 0.06166300  |
| O | -1.55629100 | -0.05872300 | 0.11903900  |
| O | -3.20652800 | -1.75911500 | -0.71348400 |
| H | -3.76709200 | -2.16719100 | 0.06078600  |
| H | -3.77548100 | -1.36247700 | -1.38903400 |
| H | -2.49845700 | -1.08139200 | -0.38923000 |
| O | -4.43925800 | -2.81113100 | 1.17236800  |
| H | -4.57245500 | -3.76617000 | 1.19984200  |
| H | -5.14838400 | -2.41276700 | 1.69038900  |

**W3-PT-1**

|   |            |             |             |
|---|------------|-------------|-------------|
| H | 1.49718100 | 0.82046000  | -0.26639400 |
| O | 1.05106800 | -0.05136100 | -0.60535900 |
| H | 0.08457400 | -0.08450500 | -0.38685500 |
| O | 2.50532500 | -2.09942500 | 0.21510500  |
| H | 2.47852400 | -3.02394200 | -0.09000900 |

|   |             |             |             |
|---|-------------|-------------|-------------|
| H | 1.53032900  | -0.87339600 | -0.30250600 |
| O | 2.05552100  | 2.10969400  | 0.12743900  |
| H | 2.50384800  | 2.27464400  | 0.96518700  |
| H | 2.45645100  | 2.69819500  | -0.52346600 |
| C | -1.79536900 | -0.09921900 | -0.09574300 |
| O | -2.91845900 | -0.09631200 | 0.04948100  |

**W3-PT-2**

|   |             |             |             |
|---|-------------|-------------|-------------|
| H | 2.72424000  | 1.26007700  | 0.03866400  |
| O | 1.81620500  | 0.17235300  | -0.52479300 |
| H | 0.85063000  | 0.09954200  | -0.32537400 |
| C | -1.10694800 | -0.18551100 | 0.00446200  |
| O | -2.20894300 | -0.39382700 | 0.16918900  |
| O | 3.41659300  | 1.91185100  | 0.42243700  |
| H | 4.40046600  | 1.56984400  | 0.33084200  |
| H | 3.30763800  | 2.80030400  | 0.05435400  |
| O | 5.71781900  | 1.01083600  | 0.30800300  |
| H | 6.28446600  | 0.96028000  | -0.47060200 |
| H | 6.29461700  | 1.03052100  | 1.08098400  |

2. Tables of calculated frequencies and intensities of each optimized structure of [CO-(H<sub>2</sub>O)<sub>n</sub>]<sup>+</sup> (*n* = 2 and 3) across the full frequency range

All frequencies are scaled by 0.9529

A. *n* = 2

W2-HOCO

| Mode | Frequency (cm <sup>-1</sup> ) | Intensity (km/mol) |
|------|-------------------------------|--------------------|
| 1    | 39.67                         | 45.9264            |
| 2    | 64.19                         | 18.8677            |
| 3    | 177.53                        | 65.9508            |
| 4    | 372.11                        | 264.1011           |
| 5    | 452.05                        | 11.3257            |
| 6    | 521.29                        | 125.5673           |
| 7    | 582.96                        | 86.3176            |
| 8    | 627.45                        | 25.7027            |
| 9    | 1096.53                       | 232.3823           |
| 10   | 1133.44                       | 75.3837            |
| 11   | 1226.02                       | 363.4778           |
| 12   | 1559.54                       | 192.3262           |
| 13   | 1608.66                       | 61.4301            |
| 14   | 1745.24                       | 1285.4840          |
| 15   | 2057.02                       | 2970.3242          |
| 16   | 3515.57                       | 215.6547           |
| 17   | 3545.63                       | 263.6303           |
| 18   | 3600.59                       | 335.7013           |

**W2-HCOOH**

| <b>Mode</b> | <b>Frequency (cm<sup>-1</sup>)</b> | <b>Intensity (km/mol)</b> |
|-------------|------------------------------------|---------------------------|
| 1           | 85.49                              | 35.8618                   |
| 2           | 102.90                             | 30.5869                   |
| 3           | 210.84                             | 49.1663                   |
| 4           | 408.05                             | 396.3326                  |
| 5           | 490.02                             | 171.6327                  |
| 6           | 518.82                             | 0.1903                    |
| 7           | 557.98                             | 150.3370                  |
| 8           | 886.54                             | 3473.6133                 |
| 9           | 983.97                             | 0.1046                    |
| 10          | 1129.84                            | 66.6661                   |
| 11          | 1287.32                            | 180.6365                  |
| 12          | 1392.77                            | 206.9475                  |
| 13          | 1484.94                            | 79.3392                   |
| 14          | 1583.72                            | 260.2915                  |
| 15          | 1643.40                            | 579.8084                  |
| 16          | 2961.73                            | 31.5683                   |
| 17          | 3561.05                            | 120.6877                  |
| 18          | 3655.17                            | 261.0154                  |

**W2-PT-1**

| <b>Mode</b> | <b>Frequency (cm<sup>-1</sup>)</b> | <b>Intensity (km/mol)</b> |
|-------------|------------------------------------|---------------------------|
| 1           | 50.53                              | 0.8105                    |
| 2           | 104.99                             | 146.4899                  |
| 3           | 159.95                             | 3.9064                    |
| 4           | 180.68                             | 4.9135                    |
| 5           | 223.42                             | 57.3416                   |
| 6           | 305.69                             | 65.4333                   |
| 7           | 367.68                             | 66.7545                   |
| 8           | 426.73                             | 140.0339                  |
| 9           | 551.78                             | 47.2987                   |
| 10          | 775.86                             | 44.6516                   |
| 11          | 1004.01                            | 220.7500                  |
| 12          | 1594.89                            | 6.0526                    |
| 13          | 1649.71                            | 24.9545                   |
| 14          | 2070.89                            | 1.0030                    |
| 15          | 2616.24                            | 2685.9533                 |
| 16          | 2806.61                            | 1537.0491                 |
| 17          | 3544.81                            | 110.4418                  |
| 18          | 3583.51                            | 275.8431                  |

**W2-PT-2**

| <b>Mode</b> | <b>Frequency (cm<sup>-1</sup>)</b> | <b>Intensity (km/mol)</b> |
|-------------|------------------------------------|---------------------------|
| 1           | 44.59                              | 10.8916                   |
| 2           | 64.00                              | 51.6775                   |
| 3           | 144.07                             | 8.1401                    |
| 4           | 150.45                             | 44.7621                   |
| 5           | 187.29                             | 41.5787                   |
| 6           | 447.73                             | 80.8098                   |
| 7           | 497.79                             | 51.3017                   |
| 8           | 522.94                             | 252.4521                  |
| 9           | 571.07                             | 158.1622                  |
| 10          | 828.60                             | 25.3928                   |
| 11          | 1057.09                            | 626.7589                  |
| 12          | 1225.64                            | 2479.4588                 |
| 13          | 1581.60                            | 170.2683                  |
| 14          | 1665.02                            | 1030.5794                 |
| 15          | 2061.28                            | 4.8511                    |
| 16          | 3031.55                            | 1135.8900                 |
| 17          | 3537.83                            | 141.9825                  |
| 18          | 3627.46                            | 310.7668                  |

**B.  $n = 3$**

**W3-HOCO**

| <b>Mode</b> | <b>Frequency (cm<sup>-1</sup>)</b> | <b>Intensity (km/mol)</b> |
|-------------|------------------------------------|---------------------------|
| 1           | 30.93                              | 34.3000                   |
| 2           | 44.58                              | 6.0806                    |
| 3           | 71.02                              | 15.9274                   |
| 4           | 91.16                              | 2.6498                    |
| 5           | 110.67                             | 18.3029                   |
| 6           | 228.53                             | 227.6836                  |
| 7           | 261.02                             | 152.2265                  |
| 8           | 353.79                             | 84.1707                   |
| 9           | 385.48                             | 170.0077                  |
| 10          | 432.40                             | 16.1731                   |
| 11          | 558.27                             | 38.5719                   |
| 12          | 569.72                             | 66.8183                   |
| 13          | 638.68                             | 5.5249                    |
| 14          | 884.18                             | 89.3224                   |
| 15          | 1138.15                            | 83.9454                   |
| 16          | 1205.75                            | 160.0529                  |
| 17          | 1228.07                            | 325.0325                  |
| 18          | 1532.33                            | 4.2416                    |
| 19          | 1616.85                            | 39.7916                   |
| 20          | 1633.51                            | 15.7601                   |
| 21          | 1746.19                            | 788.7061                  |
| 22          | 2294.72                            | 3291.1338                 |
| 23          | 2767.36                            | 2180.9195                 |
| 24          | 3570.99                            | 263.0872                  |
| 25          | 3608.73                            | 97.6093                   |
| 26          | 3616.66                            | 207.5085                  |
| 27          | 3712.08                            | 210.6094                  |

**W3-HCOOH**

| <b>Mode</b> | <b>Frequency (cm<sup>-1</sup>)</b> | <b>Intensity (km/mol)</b> |
|-------------|------------------------------------|---------------------------|
| 1           | 16.24                              | 0.4228                    |
| 2           | 60.64                              | 1.1867                    |
| 3           | 68.64                              | 13.1879                   |
| 4           | 116.58                             | 21.2121                   |
| 5           | 165.30                             | 27.6227                   |
| 6           | 242.27                             | 231.0513                  |
| 7           | 318.06                             | 157.1208                  |
| 8           | 347.76                             | 83.0622                   |
| 9           | 383.09                             | 157.2634                  |
| 10          | 435.75                             | 36.4276                   |
| 11          | 508.94                             | 34.4187                   |
| 12          | 589.35                             | 5.6634                    |
| 13          | 954.47                             | 67.6539                   |
| 14          | 984.96                             | 2.0262                    |
| 15          | 1091.11                            | 55.8623                   |
| 16          | 1201.14                            | 194.4289                  |
| 17          | 1313.82                            | 7.9946                    |
| 18          | 1534.84                            | 21.7395                   |
| 19          | 1590.40                            | 595.0011                  |
| 20          | 1626.00                            | 84.8873                   |
| 21          | 1638.96                            | 22.2469                   |
| 22          | 2353.76                            | 4096.4096                 |
| 23          | 2537.54                            | 1428.2833                 |
| 24          | 2936.14                            | 10.8482                   |
| 25          | 3609.50                            | 92.3976                   |
| 26          | 3618.03                            | 206.5953                  |
| 27          | 3712.70                            | 203.7386                  |

**W3-PT-1**

| <b>Mode</b> | <b>Frequency (cm<sup>-1</sup>)</b> | <b>Intensity (km/mol)</b> |
|-------------|------------------------------------|---------------------------|
| 1           | 38.49                              | 2.4801                    |
| 2           | 51.51                              | 5.6727                    |
| 3           | 64.91                              | 3.1100                    |
| 4           | 108.32                             | 64.9267                   |
| 5           | 114.17                             | 77.6131                   |
| 6           | 156.72                             | 14.2835                   |
| 7           | 168.03                             | 1.2741                    |
| 8           | 181.72                             | 13.0793                   |
| 9           | 255.07                             | 35.5331                   |
| 10          | 271.12                             | 201.5718                  |
| 11          | 357.65                             | 144.8203                  |
| 12          | 365.88                             | 102.6662                  |
| 13          | 414.34                             | 85.8631                   |
| 14          | 621.49                             | 48.5078                   |
| 15          | 696.20                             | 13.3655                   |
| 16          | 829.14                             | 97.5793                   |
| 17          | 1157.17                            | 179.6419                  |
| 18          | 1552.00                            | 31.1918                   |
| 19          | 1613.33                            | 6.2969                    |
| 20          | 1650.40                            | 17.3909                   |
| 21          | 2059.14                            | 5.6782                    |
| 22          | 2434.54                            | 2797.0036                 |
| 23          | 3041.66                            | 1459.0848                 |
| 24          | 3160.07                            | 1340.7570                 |
| 25          | 3566.75                            | 86.2064                   |
| 26          | 3609.69                            | 70.1820                   |
| 27          | 3711.78                            | 199.7946                  |

**W3-PT-2**

| <b>Mode</b> | <b>Frequency (cm<sup>-1</sup>)</b> | <b>Intensity (km/mol)</b> |
|-------------|------------------------------------|---------------------------|
| 1           | 11.37                              | 1.2215                    |
| 2           | 33.62                              | 2.4428                    |
| 3           | 66.52                              | 6.1375                    |
| 4           | 107.91                             | 22.0458                   |
| 5           | 124.39                             | 6.5380                    |
| 6           | 131.50                             | 11.9239                   |
| 7           | 166.88                             | 21.8139                   |
| 8           | 216.67                             | 239.6140                  |
| 9           | 334.88                             | 36.3286                   |
| 10          | 353.22                             | 121.7980                  |
| 11          | 384.31                             | 162.9229                  |
| 12          | 422.60                             | 36.0833                   |
| 13          | 474.16                             | 95.9188                   |
| 14          | 570.08                             | 17.9992                   |
| 15          | 674.34                             | 60.6087                   |
| 16          | 925.09                             | 73.7757                   |
| 17          | 1184.24                            | 194.0691                  |
| 18          | 1526.25                            | 4.2709                    |
| 19          | 1596.96                            | 33.5337                   |
| 20          | 1632.22                            | 21.1552                   |
| 21          | 2050.63                            | 12.6234                   |
| 22          | 2293.83                            | 3626.8650                 |
| 23          | 2610.57                            | 1891.2750                 |
| 24          | 3289.64                            | 660.3870                  |
| 25          | 3609.65                            | 90.3071                   |
| 26          | 3622.29                            | 208.6555                  |
| 27          | 3712.63                            | 212.1518                  |
